# Supplementary figures and images for: Ocellar adaptations for dim light vision in a nocturnal bee
Source: Oxford University Press journal article supplement (doi:10.1242/jeb.050427), 2011-03-23

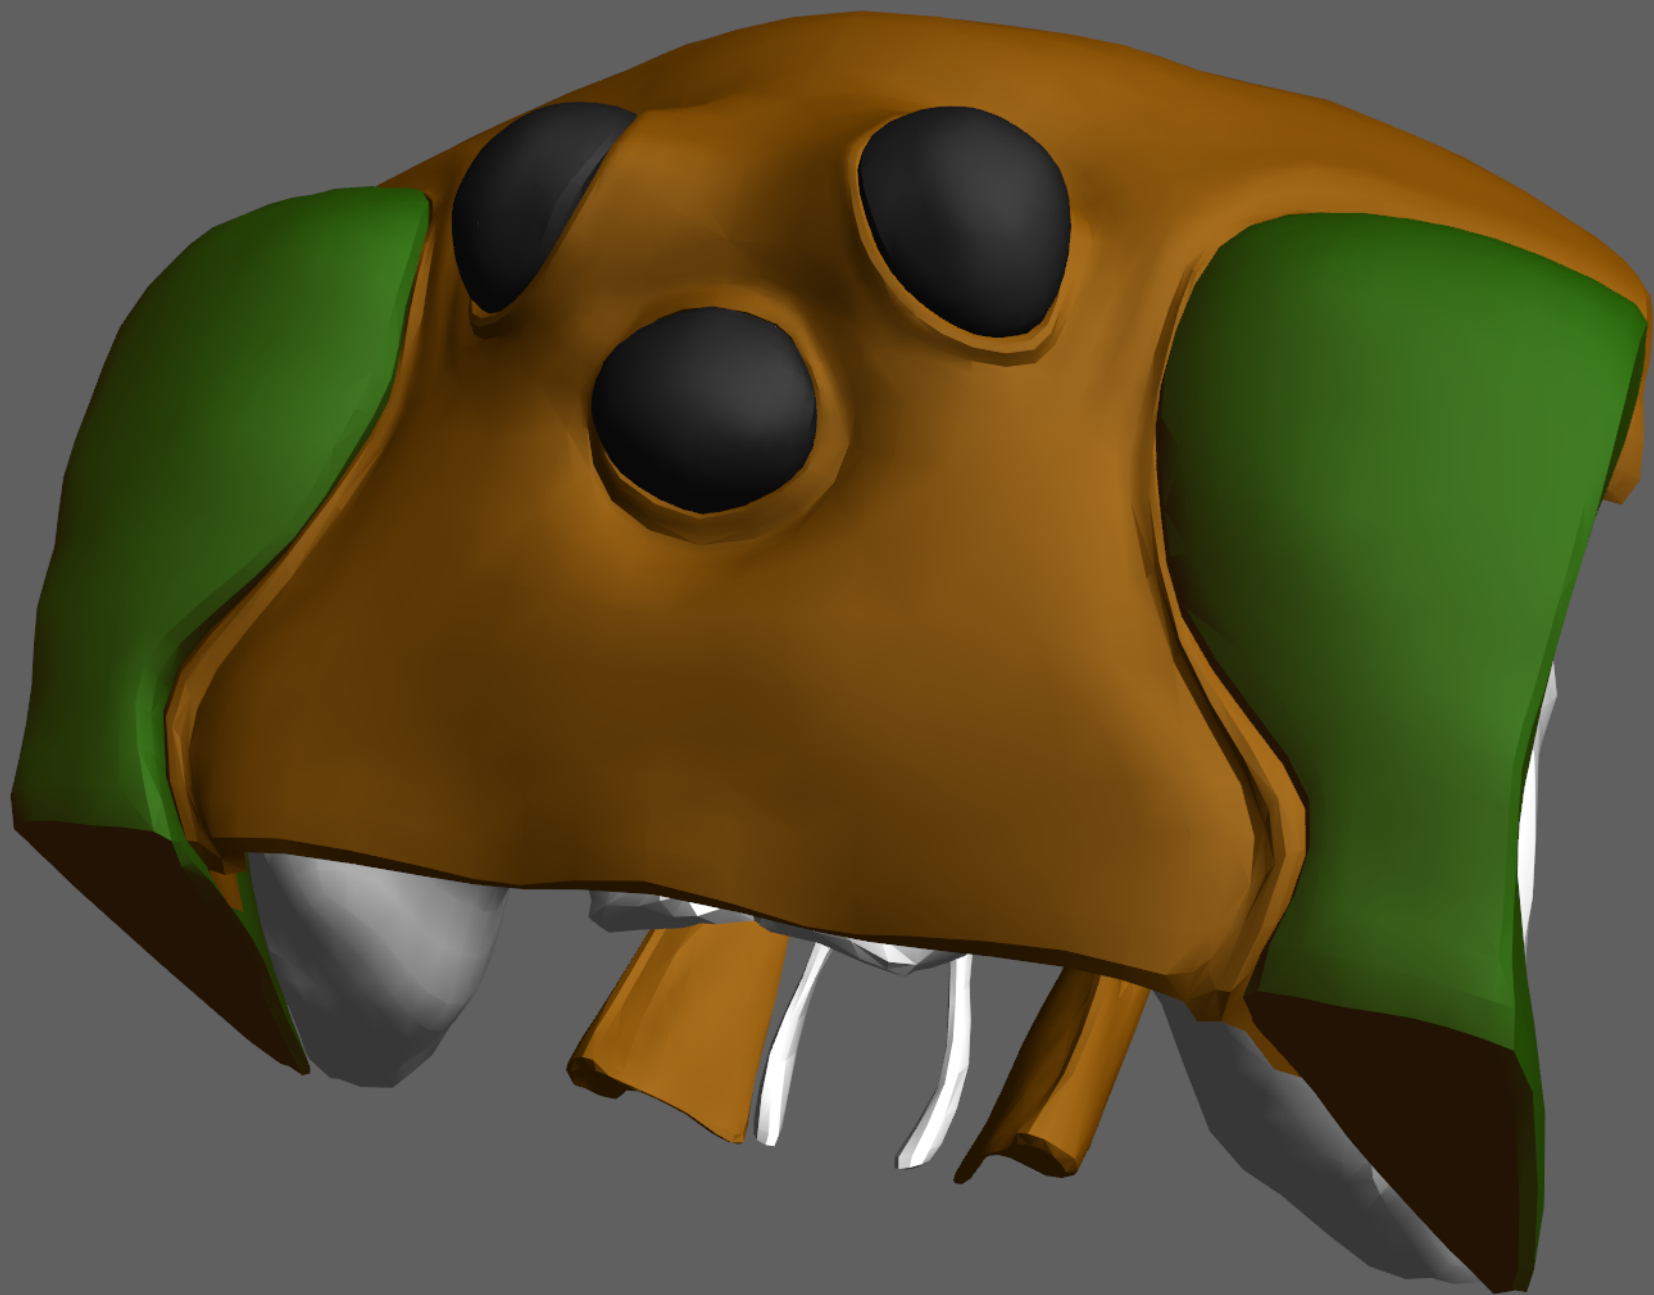

Supplement: jeb050427figs1.pdf [file jeb050427figs1.pdf]
